# Supplementary material for: Targeting human CALR‐mutated MPN progenitors with a neoepitope‐directed monoclonal antibody
Source: PubMed Central journal article supplement (PMC8982588; doi:10.15252/embr.202152904), 2022-02-14
Supplement: EMBR-23-e52904-s003.pdf [file EMBR-23-e52904-s003.pdf]

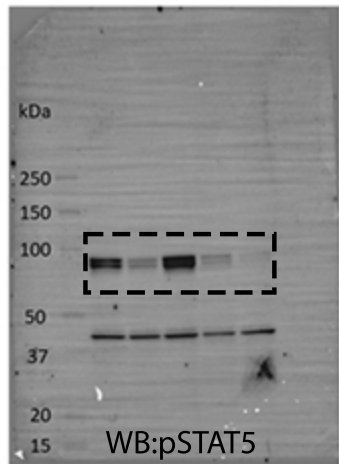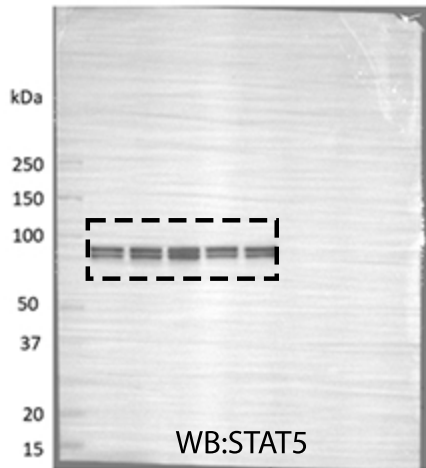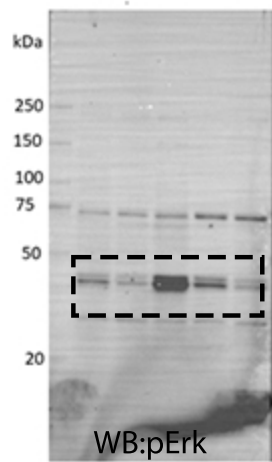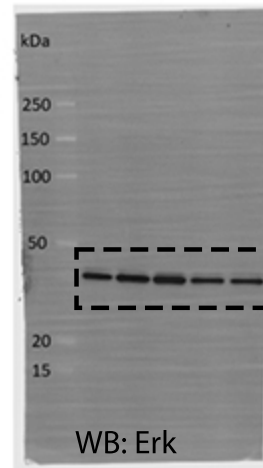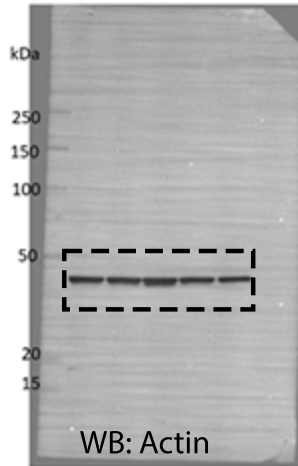

Above blots belong to Figure 4 Panel F and placed in the same order as in panel
