# Supplementary material for: Targeting human CALR‐mutated MPN progenitors with a neoepitope‐directed monoclonal antibody
Source: PubMed Central journal article supplement (PMC8982588; doi:10.15252/embr.202152904), 2022-02-14
Supplement: EMBR-23-e52904-s006.pdf [file EMBR-23-e52904-s006.pdf]

| Sample ID    | Diagnosis (Dx) | Date of Dx                           | Age at Dx                | Sex | Karyotype               | Mutational Status                            | Spleen                             | Hb (g/L) | PLT (x10 <sup>9</sup> /L) | WCC (x10 <sup>9</sup> /L) | PB Blast (%) | Ruxo Therapy | Ruxo Start Date                       |
|--------------|----------------|--------------------------------------|--------------------------|-----|-------------------------|----------------------------------------------|------------------------------------|----------|---------------------------|---------------------------|--------------|--------------|---------------------------------------|
| H02668 (UA1) | PMF            | 16/11/2007                           | 75.5                     | M   | Failed                  | CALR:c.1099_1150del (p.Leu367Thrfs*46)       | Not palpable                       | TF       | 267                       | 5.4                       | 0            | N            | N/A                                   |
| H05150 (UA2) | PMF            | 14/12/2018                           | 66.7                     | F   | 46XX                    | CALR:c.1099_1150del (p.Leu367Thrfs*46)       | 15cm via sonography                | TF       | 1111                      | 13.5                      | 0            | N            | N/A                                   |
| H01608 (UA3) | PMF            | 19/08/2014                           | 30.3                     | M   | 46XY                    | CALR:c.1103_1136del34 (p.Lys368Argfs*51)     | Not palpable                       | 145      | 883                       | 7.6                       | 0            | N            | N/A                                   |
| H01244 (UA4) | PMF            | 11/06/2002                           | 58.6                     | F   | 46XXdel(20)(q11.2q13.3) | CALR:c.1099_1150del (p.Leu367Thrfs*46)       | Palpable (was 6 cm 1 year earlier) | 100      | 109                       | 2.1                       | 1            | Y            | 10/01/2010                            |
| H04082 (UA5) | PMF            | 7/12/2010                            | 54.5                     | F   | 46XX                    | CALR:c.1099_1150del (p.Leu367Thrfs*46)       | 13cm, palpable                     | 111      | 403                       | 23.6                      | 4            | N            | N/A                                   |
| H01346 (UA6) | PMF            | 28/04/2014                           | 64.9                     | M   | 46XY                    | CALR:c.1099_1150del (p.Leu367Thrfs*46)       | Not palpable                       | 135      | 1019                      | 12.2                      | 0            | N            | N/A                                   |
| 9793         | pET-MF         | 05/03/2001 (ET), 20/04/2016 (pET-MF) | 25.8 (ET), 40.9 (pET-MF) | F   | 46XXt(9;22)(q22;q13)    | CALR:c.1099_1150del (p.Leu367Thrfs*46)       | No record                          | 109      | 199                       | 5.73                      | 2            | Y            | 06/2013 (discontinued after 4 months) |
| 9799         | PMF            | 19/11/2018                           | 55.3                     | F   | Failed                  | CALR:c.1099_1150del (p.Leu367Thrfs*46)       | 22cm via sonography                | 91       | 251                       | 16.2                      | 4            | Y            | 19/02/2019                            |
| 9800         | pET-MF         | 08/1991 (ET), 17/04/2018 (pET-MF)    | 33.5 (ET), 60.2 (pET-MF) | F   | 46XX                    | CALR:c.1154_1155insT TGTC (p.Lys385Asnfs*47) | 16cm via sonography                | 100      | 537                       | 9.1                       | 1            | Y            | 21/02/2020                            |

Dx, diagnosis; ET, essential thrombocythemia; Hb, haemoglobin; PB, peripheral blood; pET-MF, post-essential thrombocythemia myelofibrosis; PLT, platelet; PMF, primary myelofibrosis; TF, Transfusion dependent; WCC, white blood cell count.
